# Supplementary material for: Influence of Chitosan, Salicylic Acid and Jasmonic Acid on Phenylpropanoid Accumulation in Germinated Buckwheat (Fagopyrum esculentum Moench)
Source: Foods. 2019 May 6;8(5):153. doi: 10.3390/foods8050153 (PMC6560396; doi:10.3390/foods8050153)
Supplement: Supplementary file 1 [file foods-08-00153-s001.pdf]

|                                                                                     |                                                                                     |                                                                                      |
|-------------------------------------------------------------------------------------|-------------------------------------------------------------------------------------|--------------------------------------------------------------------------------------|
| 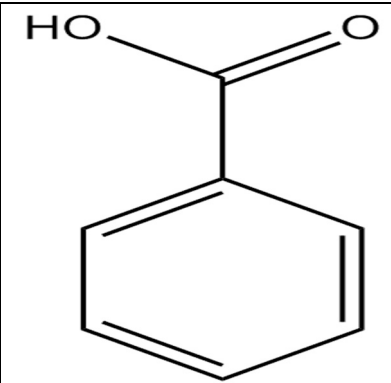   | 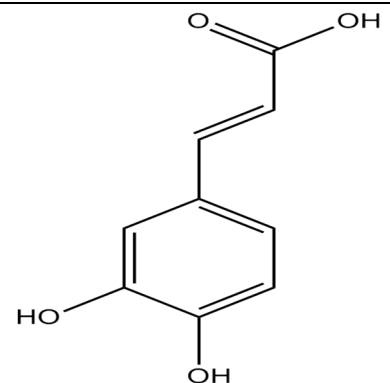  | 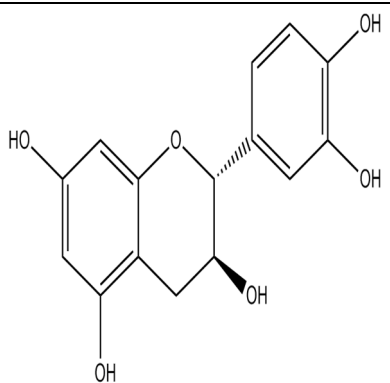  |
| Benzoic acid                                                                        | Caffeic acid                                                                        | Catechin                                                                             |
| 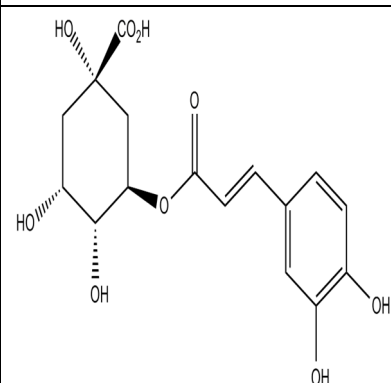  | 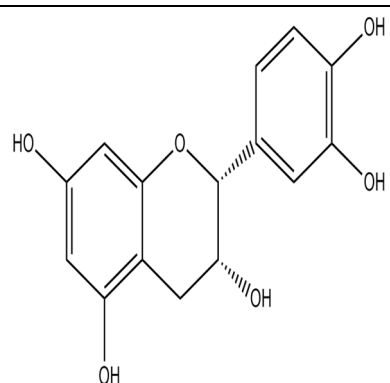 | 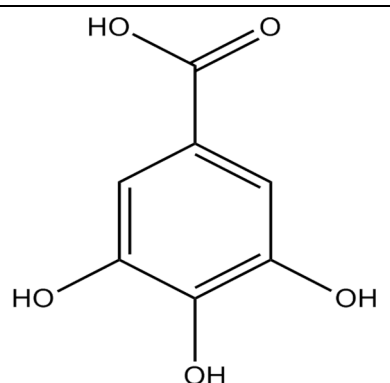 |
| Chlorogenic acid                                                                    | Epicatechin                                                                         | Gallic acid                                                                          |
| 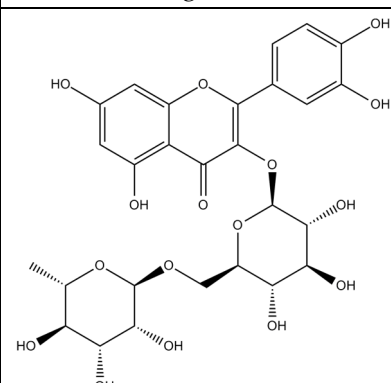 |                                                                                     |                                                                                      |
| Rutin                                                                               |                                                                                     |                                                                                      |

**Figure S1.** Chemical structures of the phenolic compounds and benzoic acid.

**Table S1.** The effect of 0.1% chitosan and 150  $\mu$ M jasmonic acid on the growth of germinated buckwheats grown for 72 hours.

|                           | <b>Fresh Weight (g)</b>        | <b>Dry Weight (g)</b> |
|---------------------------|--------------------------------|-----------------------|
| Control                   | 8.98 $\pm$ 0.63 a <sup>1</sup> | 3.29 $\pm$ 0.16 a     |
| 0.1% chitosan             | 8.37 $\pm$ 0.22 a              | 3.08 $\pm$ 0.04 a     |
| 150 $\mu$ M jasmonic acid | 8.63 $\pm$ 0.37 a              | 3.18 $\pm$ 0.11 a     |

<sup>1</sup> Means with different letters in the same column differ significantly ( $p < 0.05$ , ANOVA, Duncan Multiple Range Test (DMRT)).
